# Supplementary material for: Design of a magnesium-pridinolum complex for polylactide–drug conjugates formation
Source: Royal Society of Chemistry journal article supplement (doi:10.1039/c1dt11545f), 2011-01-01
Supplement: c1dt11545f.pdf [file c1dt11545f.pdf]

## *Electronic Supplementary Information*

# **Design of a Magnesium-Pridinolum Complex for Polylactide-Drug Conjugates Formation**

Tomasz Han, Józef Utko, Łucjan B. Jerzykiewicz, Piotr Sobota  
*Faculty of Chemistry, University of Wrocław, 14, F. Joliot-Curie 14, 50-383 Wrocław,  
(Poland)*

### **General procedures**

All reactions were conducted under dinitrogen using standard Schlenk techniques. Solvents were prepared as follows: toluene - distilled from Na/benzophenone; hexane - was heated with metallic sodium under reflux for 24 hours; methanol - was heated with metallic magnesium under reflux for 24 hours; solution of di-n-butylmagnesium (1.0 M in heptane) were obtained from Aldrich; solution of 1,1-diphenyl-3-(piperidin-1-yl) propane-1-ol = PriOH were obtained from Cardinal Pharma Trade.

### **Synthesis of [Mg( $\mu,\eta^2$ -OPri)( $\eta$ -OPri)]<sub>2</sub>**

To a mixture of 1,1-diphenyl-3-(piperidin-1-yl) propane-1-ol = PriOH (3.574 g; 19.09 mmol) in 80 mL of toluene, MgBu<sub>2</sub> (4.8 mL) was slowly and carefully added. The solution under reflux became light gray and evolution of gaseous butane started. At room temperature the solvent were removed under vacuum. The residue of the reaction was filtered off and washed with cold mixture of n-hexane and toluene (3 x 15 ml). The filtrate was left to crystallize at 268 K. White air-sensitive crystals of [Mg( $\mu,\eta^2$ -OPri)( $\eta$ -OPri)]<sub>2</sub> were grown after few days. The molecular structure of [Mg( $\mu,\eta^2$ -OPri)( $\eta$ -OPri)]<sub>2</sub> was determined by X-ray diffraction study. Yield: 55,5 %.

Anal. calcd for [Mg( $\mu,\eta^2$ -OPri)( $\eta$ -OPri)]<sub>2</sub> (MW, 1226.28): C, 80.04; H, 8.00; N, 3.97. Found: C, 79.54; H, 7.87; N, 4.02 <sup>1</sup>H NMR (C<sub>6</sub>D<sub>6</sub>, 298 K):  $\delta$  = 7.58 (d, 2H); 7.46 (d, 2H); 7.37 (d, 8H); 7.33 (d, 2H); 7.24 (t, 2H); 7.19 (t, 8H); 7.15-7.05 (m, 8H); 7.00-6.92 (m, 5H); 6.88-6.81 (m, 3H); 2.67-2.59 (m, 1H); 2.47-2.36 (m, 3H); 2.33-2.27 (m, 11H); 2.26-2.18 (m, 5H); 2.14-2.06 (m, 2H); 2.01-1.94 (m, 1H); 1.92-1.82 (m, 2H); 1.76-1.57 (m, 5H); 1.53-1.47 (m, 9H); 1.40-1.28 (m, 5H); 1.25-1.18 (m, 4H); 1.17-1.04 (m, 5H); 1.00-0.91 (m, 2H); 0.82-0.72 (m, 1H)

## Pridinolum-Polylactide-Drug Conjugates preparation.

Reactions were performed under an inert atmosphere of N<sub>2</sub> using standard Schlenk techniques. To [Mg( $\mu,\eta^2$ -OPri)( $\eta$ -OPri)]<sub>2</sub> (0.26 g; 0.42 mmol) in 40 ml of dichloromethane, L-lactide (1.23 g; 8.54 mmol) was slowly added. Reaction was carried out at room temperature for 24 hours. After reaction was completed it was quenched with methanol, the solution was concentrated in vacuum and the polymer was precipitated with hexane. The obtained polymer was filtrated off and washed with 15 ml of hexane.

**X-Ray Structure Determinations.** Crystal data and refinement details for [Mg( $\mu,\eta^2$ -OPri)( $\eta$ -OPri)]<sub>2</sub> (**1**) are given in Table S1. The crystal was mounted on glass fibers and then flash-frozen to 100(2) K (Oxford Cryosystem-Cryostream Cooler). Preliminary examination and intensities data collections were carried out on a Kuma KM4CCD  $\kappa$ -axis diffractometer with graphite-monochromated MoK $\alpha$  radiation. Data reduction and analysis were carried out with the Oxford Diffraction programs. The structure was solved by direct methods and refined by the full-matrix least-squares method on all  $F^2$  data using the SHELXTL software. Carbon bonded hydrogen atoms were included in calculated positions and refined in the riding mode using SHELXTL default parameters. During the structure refinement of [Mg( $\mu,\eta^2$ -OPri)( $\eta$ -OPri)]<sub>2</sub>, a region of electron density was identified as a highly disordered molecule of toluene. Attempts to model this electron density as the toluene molecule were not successful due to the extent of the disorder. In the final structure model, the contribution of the electron density from the toluene molecule has been removed from the intensity data using the program SQUEEZE in PLATON. This greatly improved the precision of the refinement but did not affect the geometric parameters of the rest of the structure.

**Table S1.** Experimental details for **1**.

|                                                                       |                                                                                                                                                                                                                                                          |
|-----------------------------------------------------------------------|----------------------------------------------------------------------------------------------------------------------------------------------------------------------------------------------------------------------------------------------------------|
| Chemical formula                                                      | C <sub>80</sub> H <sub>96</sub> Mg <sub>2</sub> N <sub>4</sub> O <sub>4</sub> ·2(C <sub>7</sub> H <sub>8</sub> )                                                                                                                                         |
| $M_r$                                                                 | 1410.50                                                                                                                                                                                                                                                  |
| Crystal system, space group                                           | Orthorhombic, <i>Pbcn</i>                                                                                                                                                                                                                                |
| Temperature(K)                                                        | 100                                                                                                                                                                                                                                                      |
| $a, b, c(\text{Å})$                                                   | 13.790(4), 18.241(3), 33.719(7)                                                                                                                                                                                                                          |
| $\alpha, \beta, \gamma(^{\circ})$                                     | 90, 90, 90                                                                                                                                                                                                                                               |
| $V(\text{Å}^3)$                                                       | 8482(3)                                                                                                                                                                                                                                                  |
| $Z$                                                                   | 4                                                                                                                                                                                                                                                        |
| Radiation type                                                        | Mo <i>K</i> $\alpha$                                                                                                                                                                                                                                     |
| $m(\text{mm}^{-1})$                                                   | 0.08                                                                                                                                                                                                                                                     |
| Crystal size(mm)                                                      | 0.18 × 0.12 × 0.05                                                                                                                                                                                                                                       |
| Diffractometer                                                        | Kuma KM-4 CCD kappa-axis diffractometer                                                                                                                                                                                                                  |
| Absorption correction                                                 | Analytical<br><i>CrysAlis CCD</i> . Version 1.171.33(Oxford Diffraction Ltd., 2009) Analytical numeric absorption correction using a multifaceted crystal model based on expressions derived by R.C. Clark & J.S. Comput. Phys. Commun.(1998). 111, 243. |
| $T_{\min}, T_{\max}$                                                  | 0.921, 0.933                                                                                                                                                                                                                                             |
| No. of measured, independent and observed [ $I > 2s(I)$ ] reflections | 114025, 10216, 5556                                                                                                                                                                                                                                      |
| $R_{\text{int}}$                                                      | 0.144                                                                                                                                                                                                                                                    |
| $R[F^2 > 2s(F^2)], wR(F^2), S$                                        | 0.057, 0.144, 0.93                                                                                                                                                                                                                                       |
| No. of reflections                                                    | 10216                                                                                                                                                                                                                                                    |
| No. of parameters                                                     | 470                                                                                                                                                                                                                                                      |
| No. of restraints                                                     | 0                                                                                                                                                                                                                                                        |
| H-atom treatment                                                      | H-atom parameters constrained                                                                                                                                                                                                                            |
| $\Delta\rho_{\max}, \Delta\rho_{\min}(\text{e \AA}^{-3})$             | 0.28, -0.24                                                                                                                                                                                                                                              |

**Table S2.** Selected geometric parameters for  $[\text{Mg}(\mu, \eta^2\text{-OPri})(\eta\text{-OPri})_2]$ .

|                                      |            |            |            |
|--------------------------------------|------------|------------|------------|
| Mg1—O1                               | 1.954(2)   | N1—C3      | 1.497(3)   |
| Mg1—O2                               | 1.852(2)   | N1—C4      | 1.498(3)   |
| Mg1—O1 <sup>i</sup>                  | 1.983(2)   | N1—C8      | 1.496(3)   |
| Mg1—N1 <sup>i</sup>                  | 2.183(2)   | N2—C23     | 1.475(3)   |
| O1—C1                                | 1.418(3)   | N2—C24     | 1.462(3)   |
| O2—C21                               | 1.393(3)   | N2—C28     | 1.467(3)   |
|                                      |            |            |            |
| O1—Mg1—O2                            | 119.66(7)  | C23—N2—C24 | 112.07(18) |
| O1—Mg1—O1 <sup>i</sup>               | 82.04(6)   | C23—N2—C28 | 109.53(17) |
| O1—Mg1—N1 <sup>i</sup>               | 116.70(7)  | C24—N2—C28 | 110.14(18) |
| O1 <sup>i</sup> —Mg1—O2              | 120.78(7)  | O1—C1—C2   | 107.63(16) |
| O2—Mg1—N1 <sup>i</sup>               | 116.16(7)  | O1—C1—C9   | 111.16(16) |
| O1 <sup>i</sup> —Mg1—N1 <sup>i</sup> | 93.83(7)   | O1—C1—C15  | 109.05(16) |
| Mg1—O1—C1                            | 139.81(12) | N1—C3—C2   | 112.76(16) |
| Mg1—O1—Mg1 <sup>i</sup>              | 97.50(7)   | N1—C4—C5   | 115.21(18) |
| Mg1 <sup>i</sup> —O1—C1              | 122.60(12) | N1—C8—C7   | 114.85(18) |
| Mg1—O2—C21                           | 158.94(14) | O2—C21—C22 | 109.56(17) |
| C3—N1—C4                             | 111.18(17) | O2—C21—C29 | 111.11(17) |
| C3—N1—C8                             | 110.73(16) | O2—C21—C35 | 108.86(17) |
| Mg1 <sup>i</sup> —N1—C3              | 107.47(12) | N2—C23—C22 | 113.59(18) |
| C4—N1—C8                             | 108.82(16) | N2—C24—C25 | 111.4(2)   |
| Mg1 <sup>i</sup> —N1—C4              | 108.23(12) | N2—C28—C27 | 111.49(19) |
| Mg1 <sup>i</sup> —N1—C8              | 110.37(13) |            |            |

Symmetry code: (i)  $-x+1, y, -z+1/2$ .

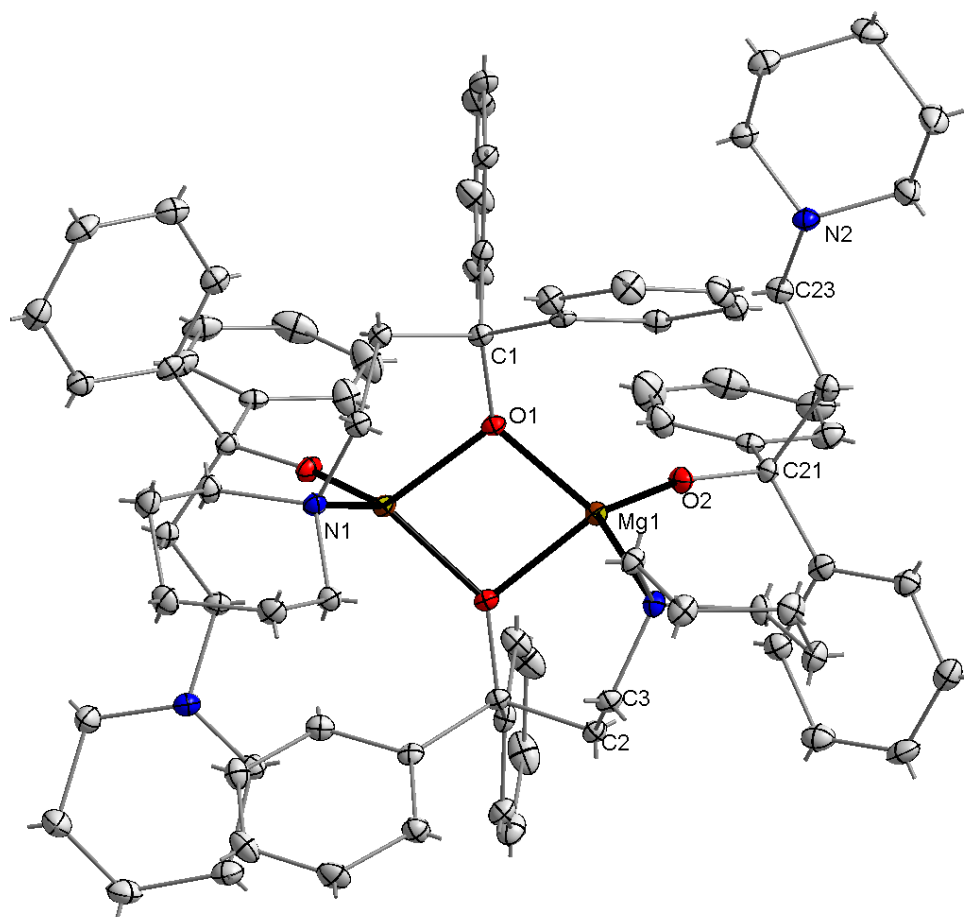

**Figure S1.** Molecular structure of  $[\text{Mg}(\mu,\eta^2\text{-OPri})(\eta\text{-OPri})]_2$ , as determined by X-ray.
